# Supplementary material
Source: ML conference proceedings conference paper supplement (https://proceedings.neurips.cc/paper_files/paper/2010/hash/05049e90fa4f5039a8cadc6acbb4b2cc-Abstract.html)
Supplement: Supplementary file 1 [file 05049e90fa4f5039a8cadc6acbb4b2cc-Supplemental.zip]

Archive with 1 entries (1 files):
- extra/NIPS2010_0367_extra.pdf
